# Supplementary material for: Effects of In-Person Assistance vs Personalized Written Resources About Social Services on Household Social Risks and Child and Caregiver Health: A Randomized Clinical Trial
Source: PubMed Central journal article supplement (PMC7064877; doi:10.1001/jamanetworkopen.2020.0701), 2020-03-10
Supplement: jamanetwopen-3-e200701-s003.pdf [file jamanetwopen-3-e200701-s003.pdf]

## Data Sharing Statement

Gottlieb. Effects of In-Person Assistance vs Personalized Written Resources About Social Services on Household Social Risks and Child and Caregiver Health. *JAMA Netw Open*. Published March 10, 2020. 10.1001/jamanetworkopen.2020.0701

### Data

**Data available:** Yes

**Data types:** Deidentified participant data

**How to access data:** Request for data : [holly.wing@ucsf.edu](mailto:holly.wing@ucsf.edu)

**When available:** With publication

### Supporting Documents

**Document types:** None

### Additional Information

**Who can access the data:** Researchers whose proposed use of the data has been approved

**Types of analyses:** Specified uses at the discretion of the UCSF research team

**Mechanisms of data availability:** After approval of proposal and with a signed data use agreement
